# Supplementary material for: Antimicrobial Stewardship Strategies Including Point-of-Care Testing (POCT) for Pediatric Patients with Upper-Respiratory-Tract Infections in Primary Care: A Systematic Review of Economic Evaluations
Source: MDPI journal article supplement (doi:10.3390/antibiotics11081139), 2022-08-22
Supplement: s1 [file s1]

## Search strategy

Cochrane central

Date Run: 27/07/2021 13:05:14

| ID  | Search Hits                                                                                                                                                              |
|-----|--------------------------------------------------------------------------------------------------------------------------------------------------------------------------|
| #1  | pharyngitis OR tonsillitis OR tonsillopharyngitis OR pharyngotonsillitis OR nasopharyngitis 5010                                                                         |
| #2  | sore* NEAR/2 throat* 3445                                                                                                                                                |
| #3  | (throat* or pharyn* or tonsil*) NEAR/4 (infect* or inflam* or strep*) 1316                                                                                               |
| #4  | pharynx 1686                                                                                                                                                             |
| #5  | "group a" near/5 streptococc* 502                                                                                                                                        |
| #6  | gabhs OR beta-hemoly* or beta-haemoly* OR lancefield group a OR streptococcus pyogenes or "s. pyogenes" or "s.pyogenes" 734                                              |
| #7  | streptococc* NEAR/4 infect* 1422                                                                                                                                         |
| #8  | #1 OR #2 OR #3 OR #4 OR #5 OR #6 OR #7 10648                                                                                                                             |
| #9  | (econom* or cost* or utilit* or benefit* or allocat* or effective*) 559809                                                                                               |
| #10 | immunoassay* OR immunoenzyme technique* 4086                                                                                                                             |
| #11 | enzyme near/2 (immunoassay* or immuno-assay* or immunosorbent) 10344                                                                                                     |
| #12 | immunochromatograph* OR immunosorbent technique* OR enzyme-linked immunosorbent assay* OR elisa OR elisas OR eia OR eias 15431                                           |
| #13 | sandwich* near/2 assay* 36                                                                                                                                               |
| #14 | lateral flow near/2 assay 35                                                                                                                                             |
| #15 | optical near/2 (immunoassay* or immuno-assay*) 9                                                                                                                         |
| #16 | oia or oias OR bacterial antigen* OR diagnostic reagent kit OR diagnostic reagent kits OR point-of-care systems 4436                                                     |
| #17 | (rapid or "point of care" or "near patient" or poc or poct or bedside) near/5 (test or tests or testing or detect* or diagnos* or screen* or kit or kits or assay*) 5067 |
| #18 | radt or radts or rdt or rdts 455                                                                                                                                         |
| #19 | antigen* near/3 detect* 597                                                                                                                                              |
| #20 | c-reactive protein OR crp 27267                                                                                                                                          |
| #21 | #10 OR #11 OR #12 OR #13 OR #14 OR #15 OR #16 OR #17 OR #18 OR #19 OR #20 51471                                                                                          |
| #22 | #8 AND #9 AND #21 in Trials (Word variations have been searched) 300                                                                                                     |

Date: July 27, 2021

Ovid MEDLINE(R) and Epub Ahead of Print, In-Process, In-Data-Review & Other Non-Indexed Citations, Daily and Versions(R) <1946 to July 26, 2021>

- 1       pharyngitis.mp. or exp Pharyngitis/   18814
- 2       tonsillitis.mp. [mp=title, abstract, original title, name of substance word, subject heading word, floating sub-heading word, keyword heading word, organism supplementary concept word, protocol supplementary concept word, rare disease supplementary concept word, unique identifier, synonyms]   9377
- 3       (tonsillopharyngitis or pharyngotonsillitis or nasopharyngitis).mp. [mp=title, abstract, original title, name of substance word, subject heading word, floating sub-heading word, keyword heading word, organism supplementary concept word, protocol supplementary concept word, rare disease supplementary concept word, unique identifier, synonyms]   2140
- 4       (sore\* adj2 throat\*).mp. [mp=title, abstract, original title, name of substance word, subject heading word, floating sub-heading word, keyword heading word, organism supplementary concept word, protocol supplementary concept word, rare disease supplementary concept word, unique identifier, synonyms]   6253
- 5       ((throat\* or pharyn\* or tonsil\*) adj4 (infect\* or inflam\* or strep\*)).mp. [mp=title, abstract, original title, name of substance word, subject heading word, floating sub-heading word, keyword heading word, organism supplementary concept word, protocol supplementary concept word, rare disease supplementary concept word, unique identifier, synonyms]   7193
- 6       Pharynx/mi   3790
- 7       ("group a" adj5 streptococc\*).mp. [mp=title, abstract, original title, name of substance word, subject heading word, floating sub-heading word, keyword heading word, organism supplementary concept word, protocol supplementary concept word, rare disease supplementary concept word, unique identifier, synonyms]   10331
- 8       gabhs.mp. [mp=title, abstract, original title, name of substance word, subject heading word, floating sub-heading word, keyword heading word, organism supplementary concept word, protocol supplementary concept word, rare disease supplementary concept word, unique identifier, synonyms]   405
- 9       (beta-hemoly\* or beta-haemoly\*).mp. [mp=title, abstract, original title, name of substance word, subject heading word, floating sub-heading word, keyword heading word, organism supplementary concept word, protocol supplementary concept word, rare disease supplementary concept word, unique identifier, synonyms]   5595
- 10      lancefield group a.mp. [mp=title, abstract, original title, name of substance word, subject heading word, floating sub-heading word, keyword heading word, organism supplementary concept word, protocol supplementary concept word, rare disease supplementary concept word, unique identifier, synonyms]   133
- 11      Streptococcus pyogenes/   13836
- 12      (streptococcus pyogenes or "s. pyogenes" or "s.pyogenes").mp. [mp=title, abstract, original title, name of substance word, subject heading word, floating sub-heading word, keyword heading word, organism supplementary concept word, protocol supplementary concept word, rare disease supplementary concept word, unique identifier, synonyms]   18089
- 13      Streptococcal Infections/   33863

# Embase Session Results

Date: July 27, 2021

No.

Query

Results

2,275

**#40**

#39 AND [embase]/lim

2,425

**#39**

#15 AND #18 AND #38

1,248,288

**#38**

#19 OR #20 OR #21 OR #22 OR #23 OR #24 OR #25 OR #26 OR #27 OR #28 OR  
#29 OR #30 OR #31 OR #32 OR #33 OR #34 OR #35 OR #36 OR #37

109,034

**#37**

crp

## Accessibility Information and Tips

### Print Search History

Tuesday, July 27, 2021 10:27:22 AM

| #   | Query                                                                                                                             | Limiters/Expanders                                                                                           | Last Run Via                                                                                                 | Results |
|-----|-----------------------------------------------------------------------------------------------------------------------------------|--------------------------------------------------------------------------------------------------------------|--------------------------------------------------------------------------------------------------------------|---------|
| S41 | S14 AND S19 AND S39                                                                                                               | Limiters - Exclude MEDLINE records<br>Expanders - Apply equivalent subjects<br>Search modes - Boolean/Phrase | Interface - EBSCOhost<br>Research Databases<br>Search Screen - Advanced Search<br>Database - CINAHL Complete | 83      |
| S40 | S14 AND S19 AND S39                                                                                                               | Expanders - Apply equivalent subjects<br>Search modes - Boolean/Phrase                                       | Interface - EBSCOhost<br>Research Databases<br>Search Screen - Advanced Search<br>Database - CINAHL Complete | 314     |
| S39 | S20 OR S21 OR S22 OR S23 OR S24 OR S25 OR S26 OR S27 OR S28 OR S29 OR S30 OR S31 OR S32 OR S33 OR S34 OR S35 OR S36 OR S37 OR S38 | Expanders - Apply equivalent subjects<br>Search modes - Boolean/Phrase                                       | Interface - EBSCOhost<br>Research Databases<br>Search Screen - Advanced Search<br>Database - CINAHL Complete | 186,846 |
| S38 | crp                                                                                                                               | Expanders - Apply equivalent subjects<br>Search modes - Boolean/Phrase                                       | Interface - EBSCOhost<br>Research Databases<br>Search Screen - Advanced Search<br>Database - CINAHL Complete | 14,717  |
| S37 | (MH "C-Reactive Protein")                                                                                                         | Expanders - Apply equivalent subjects<br>Search modes - Boolean/Phrase                                       | Interface - EBSCOhost<br>Research Databases<br>Search Screen - Advanced Search<br>Database - CINAHL Complete | 17,668  |
| S36 | antigen* n3 detect*                                                                                                               | Expanders - Apply equivalent subjects<br>Search modes - Boolean/Phrase                                       | Interface - EBSCOhost<br>Research Databases<br>Search Screen - Advanced Search<br>Database - CINAHL Complete | 1,422   |
